# Supplementary material for: Phylogenetic and Phylodynamic Analyses of HCV Strains Circulating among Patients Using Injectable Drugs in Central Italy
Source: MDPI journal article supplement (doi:10.3390/microorganisms9071432), 2021-07-02
Supplement: s1 [file s1]

**Table S5.** Estimation of temporal reproduction number distribution using a Birth-Death Skyline (contemporary) model for homochronous HCV sequences for A) Gt1a and B) Gt3a. For these analyses, a GTR gamma site model (4 categories) was selected with a strict molecular clock with sequence date constraints where possible.

| <b>A) Gt1a - Birth and Death Skyline Contemporary (homochronous sequences)</b> |                    |                    |                    |                    |                     |                   |                    |                    |                     |                     |
|--------------------------------------------------------------------------------|--------------------|--------------------|--------------------|--------------------|---------------------|-------------------|--------------------|--------------------|---------------------|---------------------|
| Summary Statistic                                                              | Rep.Num. cont1     | Rep.Num. cont2     | Rep.Num. cont3     | Rep.Num. cont4     | Rep.Num. cont5      | Rep.Num. cont6    | Rep.Num. cont7     | Rep.Num. cont8     | Rep.Num. cont9      | Rep.Num. Cont10     |
| mean                                                                           | 1.1699             | 1.1043             | 1.0711             | 1.0577             | 0.982               | 0.98              | 0.9266             | 0.9377             | 2.7836              | 25.0669             |
| stderr of mean                                                                 | 0.0172             | 0.017              | 0.0159             | 0.0163             | 0.0148              | 0.0139            | 0.0141             | 0.0235             | 0.1566              | 0.8245              |
| stdev                                                                          | 1.1087             | 1.0654             | 1.0026             | 1.0494             | 0.9284              | 0.9181            | 0.8606             | 0.9191             | 2.9815              | 20.8542             |
| variance                                                                       | 1.2292             | 1.135              | 1.0052             | 1.1013             | 0.862               | 0.8429            | 0.7407             | 0.8447             | 8.8891              | 434.8959            |
| median                                                                         | 0.8297             | 0.7992             | 0.7747             | 0.7532             | 0.7074              | 0.7119            | 0.6712             | 0.6674             | 1.7792              | 19.002              |
| value range                                                                    | [0.0283 - 21.1446] | [0.0268 - 22.7161] | [0.0227 - 13.3908] | [0.0179 - 15.5968] | [0.023 - 12.9868]   | [0.0195 - 9.6884] | [0.0186 - 10.5462] | [0.0304 - 11.8969] | [0.012 - 37.6422]   | [2.85 - 308.726]    |
| geometric mean                                                                 | 0.8057             | 0.7741             | 0.7426             | 0.7372             | 0.689               | 0.6871            | 0.655              | 0.6534             | 1.594               | 19.5349             |
| 95% HPD interval                                                               | [0.0412 - 3.3206]  | [0.0268 - 2.9997]  | [0.0227 - 2.9494]  | [0.0532 - 2.9422]  | [0.0255 - 2.7164]   | [0.0316 - 2.7282] | [0.0286 - 2.5637]  | [0.0348 - 2.615]   | [0.0347 - 8.6137]   | [2.85 - 64.1684]    |
| auto-correlation time (ACT)                                                    | 2155.9679          | 2285.2482          | 2273.5997          | 2171.0787          | 2299.0922           | 2058.4751         | 2419.0874          | 5896.7084          | 24831.4393          | 14070.2402          |
| effective sample size (ESS)                                                    | 4174.9             | 3938.7             | 3958.9             | 4145.9             | 3915                | 4372.7            | 3720.8             | 1526.4             | 362.5               | 639.7               |
| <b>B) Gt3a - Birth and Death Skyline Contemporary (homochronous sequences)</b> |                    |                    |                    |                    |                     |                   |                    |                    |                     |                     |
| Summary Statistic                                                              | Rep.Num. cont1     | Rep.Num. cont2     | Rep.Num. cont3     | Rep.Num. cont4     | Rep.Num. cont5      | Rep.Num. cont6    | Rep.Num. cont7     | Rep.Num. cont8     | Rep.Num. cont9      | Rep.Num. Cont10     |
| mean                                                                           | 1.179              | 1.1372             | 1.0932             | 1.0833             | 1.2176              | 1.0682            | 1.1117             | 1.8284             | 7.3014              | 18.7462             |
| stderr of mean                                                                 | 0.0116             | 0.0113             | 0.0129             | 0.0438             | 0.21                | 0.0861            | 0.1301             | 0.4421             | 2.4613              | 3.0003              |
| stdev                                                                          | 1.0982             | 1.0752             | 1.0428             | 1.1513             | 2.5369              | 1.453             | 1.8853             | 4.5969             | 13.2584             | 20.1342             |
| variance                                                                       | 1.2061             | 1.156              | 1.0874             | 1.3256             | 6.4358              | 2.1113            | 3.5545             | 21.1315            | 175.7852            | 405.3873            |
| median                                                                         | 0.8393             | 0.8094             | 0.7807             | 0.7526             | 0.74                | 0.7187            | 0.7087             | 0.7336             | 1.2101              | 12.6376             |
| value range                                                                    | [0.0203 - 14.0936] | [0.016 - 17.6834]  | [0.0275 - 13.244]  | [0.0171 - 22.5855] | [0.0291 - 142.0836] | [0.0141 - 34.379] | [0.0124 - 52.6456] | [0.0351 - 91.78]   | [0.0231 - 202.5518] | [0.0575 - 241.8379] |
| geometric mean                                                                 | 0.811              | 0.7902             | 0.7617             | 0.7347             | 0.7327              | 0.7085            | 0.6989             | 0.7945             | 1.8925              | 10.3829             |

|                                    |                   |                   |                   |                   |                   |                   |                   |                   |                    |                    |
|------------------------------------|-------------------|-------------------|-------------------|-------------------|-------------------|-------------------|-------------------|-------------------|--------------------|--------------------|
| <b>95% HPD interval</b>            | [0.0496 - 3.3426] | [0.0334 - 3.1941] | [0.0275 - 3.0305] | [0.0363 - 3.0696] | [0.0311 - 3.1558] | [0.0348 - 2.9211] | [0.0348 - 3.0609] | [0.0351 - 6.6435] | [0.0231 - 33.1138] | [0.0575 - 56.6407] |
| <b>auto-correlation time (ACT)</b> | 10000             | 10000             | 13768.8667        | 1.30E+05          | 6.17E+05          | 3.16E+05          | 4.29E+05          | 8.32E+05          | 3.10E+06           | 2.00E+06           |
| <b>effective sample size (ESS)</b> | 9001              | 9001              | 6537.2            | 692               | 145.9             | 285               | 209.8             | 108.1             | 29                 | 45                 |
