# Supplementary material for: Phylogenetic and Phylodynamic Analyses of HCV Strains Circulating among Patients Using Injectable Drugs in Central Italy
Source: MDPI journal article supplement (doi:10.3390/microorganisms9071432), 2021-07-02
Supplement: s1 [file s1]

**Table S1.** List of global GenBank hepatitis C virus (HCV) genome sequences used in phylogenetic and phylodynamic analyses

| <b>GenBank sequences</b>                     | <b>Acc. Number</b> | <b>Genotype</b> | <b>Year</b> | <b>Country</b> |
|----------------------------------------------|--------------------|-----------------|-------------|----------------|
| 1a.AU.2008.111.JX437205                      | JN437205           | 1a              | 2008        | AU             |
| 1a.BR.2003.BR601.EF032886                    | EF032886           | 1a              | 2003        | BR             |
| 1a.CH.2001.HCV-1a/CH/BID-V242/2001.EU482854  | EU482854           | 1a              | 2001        | CH             |
| 1a.CH.2002.HCV-1a/CH/BID-V249/2002.EU482855  | EU482855           | 1a              | 2002        | CH             |
| 1a.CH.2002.HCV-1a/CH/BID-V250/2002.EU482856  | EU482856           | 1a              | 2002        | CH             |
| 1a.CH.2003.HCV-1a/CH/BID-V256/2003.EU155350  | EU155350           | 1a              | 2003        | CH             |
| 1a.CH.2004.HCV-1a/CH/BID-V262/2004.EU155352  | EU155352           | 1a              | 2004        | CH             |
| 1a.CH.2005.HCV-1a/CH/BID-V240/2005.EU155348  | EU155348           | 1a              | 2005        | CH             |
| 1a.CH.2005.HCV-1a/CH/BID-V263/2005.EU482857  | EU482857           | 1a              | 2005        | CH             |
| 1a.CH.2006.HCV-1a/CH/BID-V271/2006.EU482858  | EU482858           | 1a              | 2006        | CH             |
| 1a.DE.2003.HCV-1a/DE/BID-V24/2003.EU862823   | EU862823           | 1a              | 2003        | DE             |
| 1a.DE.2003.HCV-1a/DE/BID-V25/2003.EU482831   | EU482831           | 1a              | 2003        | DE             |
| 1a.DE.2003.HCV-1a/DE/BID-V26/2003.EU155378   | EU155378           | 1a              | 2003        | DE             |
| 1a.DE.2003.HCV-1a/DE/BID-V27/2003.EU862832   | EU862832           | 1a              | 2003        | DE             |
| 1a.DE.2004.HCV-1a/DE/BID-V1563/2004.EU687194 | EU687194           | 1a              | 2004        | DE             |
| 1a.DE.2004.HCV-1a/DE/BID-V33/2004.EU482832   | EU482832           | 1a              | 2004        | DE             |
| 1a.DE.2004.HCV-1a/DE/BID-V35/2004.EU155380   | EU155380           | 1a              | 2004        | DE             |
| 1a.DE.2004.HCV-1a/DE/BID-V37/2004.EU862834   | EU862834           | 1a              | 2004        | DE             |
| 1a.DE.2005.HCV-1a/DE/BID-V1562/2005.EU687193 | EU687193           | 1a              | 2005        | DE             |
| 1a.DE.2007.HCV-1a/DE/BID-V1564/2007.EU687195 | EU687195           | 1a              | 2007        | DE             |
| 1a.NZ.2008.101.JX437195                      | JN437195           | 1a              | 2008        | NZ             |
| 1a.NZ.2008.102.JX437196                      | JN437196           | 1a              | 2008        | NZ             |
| 1a.NZ.2008.103.JX437197                      | JN437197           | 1a              | 2008        | NZ             |
| 1a.NZ.2008.104.JX437198                      | JN437198           | 1a              | 2008        | NZ             |
| 1a.NZ.2009.201.JX437212                      | JN437212           | 1a              | 2009        | NZ             |
| 1a.NZ.2009.202.JX437213                      | JN437213           | 1a              | 2009        | NZ             |
| 1a.NZ.2009.203.JX437214                      | JN437214           | 1a              | 2009        | NZ             |
| 1a.US.1977.H77.AF009606                      | AF009606           | 1a              | 1977        | US             |
| 1a.US.1990.HCV-1a/US/BID-V168/1990.EU255965  | EU255965           | 1a              | 1990        | US             |
| 1a.US.1990.HCV-1a/US/BID-V172/1990.EU155339  | EU155339           | 1a              | 1990        | US             |
| 1a.US.1991.HCV-1a/US/BID-V185/1991.EU155340  | EU155340           | 1a              | 1991        | US             |
| 1a.US.1992.HCV-1a/US/BID-V167/1992.EU255964  | EU255964           | 1a              | 1992        | US             |
| 1a.US.1992.HCV-1a/US/BID-V192/1992.EU155341  | EU155341           | 1a              | 1992        | US             |
| 1a.US.1996.HCV-1a/US/BID-V169/1996.EU155338  | EU155338           | 1a              | 1996        | US             |
| 1a.US.1997.HCV-1a/US/BID-V170/1997.EU255966  | EU255966           | 1a              | 1997        | US             |
| 1a.US.2000.HCV-1a/US/BID-V412/2000.EU155312  | EU155312           | 1a              | 2000        | US             |
| 1a.US.2001.HCV-1a/US/BID-V115/2001.EU155216  | EU155216           | 1a              | 2001        | US             |
| 1a.US.2001.HCV-1a/US/BID-V317/2001.EU155284  | EU155284           | 1a              | 2001        | US             |
| 1a.US.2002.HCV-1a/US/BID-V432/2002.EU155276  | EU155276           | 1a              | 2002        | US             |
| 1a.US.2002.HCV-1a/US/BID-V71/2002.EU155241   | EU155241           | 1a              | 2002        | US             |
| 1a.US.2003.HCV-1a/US/BID-V93/2003.EU155246   | EU155246           | 1a              | 2003        | US             |
| 1a.US.2004.HCV-1a/US/BID-V101/2004.EU155213  | EU155213           | 1a              | 2004        | US             |

|                                             |          |    |      |    |
|---------------------------------------------|----------|----|------|----|
| 1a.US.2004.HCV-1a/US/BID-V357/2004.EU155310 | EU155310 | 1a | 2004 | US |
| 1a.US.2005.HCV-1a/US/BID-V104/2005.EU155214 | EU155214 | 1a | 2005 | US |
| 1a.US.2005.HCV-1a/US/BID-V388/2005.EU155265 | EU155265 | 1a | 2005 | US |
| 1a.US.2006.HCV-1a/US/BID-V453/2006.EU255934 | EU255934 | 1a | 2006 | US |
| 1a.US.2006.HCV-1a/US/BID-V457/2006.EU155237 | EU155237 | 1a | 2006 | US |
| 1a.US.2007.HCV-1a/US/BID-V462/2007.EU255935 | EU255935 | 1a | 2007 | US |
| 1a.US.2007.HCV-1a/US/BID-V465/2007.EU155238 | EU155238 | 1a | 2007 | US |
| 1b.AU.2009.208.JX437219                     | JN437219 | 1b | 2009 | AU |
| 1b.AU.2009.313.JX437234                     | JN437234 | 1b | 2009 | AU |
| 1b.BR.2003.BR1427_P1_10-7-03.EF032892       | EF032892 | 1b | 2003 | BR |
| 1b.BR.2003.BR1427_P3_11-10-03.EF032893      | EF032893 | 1b | 2003 | BR |
| 1b.BR.2004.BR1427_P7_3-1-04.EF032894        | EF032894 | 1b | 2004 | BR |
| 1b.CH.2002.HCV-1b/CH/BID-V277/2002.EU155359 | EU155359 | 1b | 2002 | CH |
| 1b.CH.2002.HCV-1b/CH/BID-V291/2002.EU529682 | EU529682 | 1b | 2002 | CH |
| 1b.CH.2003.HCV-1b/CH/BID-V272/2003.EU482859 | EU482859 | 1b | 2003 | CH |
| 1b.CH.2003.HCV-1b/CH/BID-V275/2003.EU155357 | EU155357 | 1b | 2003 | CH |
| 1b.CH.2004.HCV-1b/CH/BID-V276/2004.EU155358 | EU155358 | 1b | 2004 | CH |
| 1b.CH.2004.HCV-1b/CH/BID-V304/2004.EU862837 | EU862837 | 1b | 2004 | CH |
| 1b.CH.2005.HCV-1b/CH/BID-V285/2005.EU155363 | EU155363 | 1b | 2005 | CH |
| 1b.CH.2005.HCV-1b/CH/BID-V287/2005.EU482874 | EU482874 | 1b | 2005 | CH |
| 1b.CH.2006.HCV-1b/CH/BID-V288/2006.EU155364 | EU155364 | 1b | 2006 | CH |
| 1b.CH.2006.HCV-1b/CH/BID-V312/2006.EU255960 | EU255960 | 1b | 2006 | CH |
| 1b.CN.2001.Whu.EU857431                     | EU857431 | 1b | 2001 | CN |
| 1b.CN.2002.GZ51969.KC844052                 | KC844052 | 1b | 2002 | CN |
| 1b.CN.2002.GZ52540.KC844051                 | KC844051 | 1b | 2002 | CN |
| 1b.CN.2003.H1.GU451218                      | GU451218 | 1b | 2003 | CN |
| 1b.CN.2003.S1.GU451221                      | GU451221 | 1b | 2003 | CN |
| 1b.CN.2004.H3.GU451219                      | GU451219 | 1b | 2004 | CN |
| 1b.CN.2004.S3.GU451223                      | GU451223 | 1b | 2004 | CN |
| 1b.CN.2007.PR50.HQ912957                    | HQ912957 | 1b | 2007 | CN |
| 1b.CN.2007.PR52.HQ912958                    | HQ912958 | 1b | 2007 | CN |
| 1b.CN.2008.PR79.HQ912959                    | HQ912959 | 1b | 2008 | CN |
| 1b.CN.2008.S4.GU451224                      | GU451224 | 1b | 2008 | CN |
| 1b.DE.2003.HCV-1b/DE/BID-V503/2003.EU482833 | EU482833 | 1b | 2003 | DE |
| 1b.DE.2003.HCV-1b/DE/BID-V504/2003.EU155382 | EU155382 | 1b | 2003 | DE |
| 1b.DE.2004.HCV-1b/DE/BID-V502/2004.EU155381 | EU155381 | 1b | 2004 | DE |
| 1b.DK.2018.pt#7-Week0.MT995341              | MT995341 | 1b | 2018 | DK |
| 1b.DK.2018.pt#7-Week12.MT995342             | MT995342 | 1b | 2018 | DK |
| 1b.DK.2018.pt#7-Week20.MT995343             | MT995343 | 1b | 2018 | DK |
| 1b.DK.2018.pt#7-Week32.MT995344             | MT995344 | 1b | 2018 | DK |
| 1b.DK.2018.pt#7-Week40.MT995345             | MT995345 | 1b | 2018 | DK |
| 1b.FR.2003.Lex.JN120912                     | JN120912 | 1b | 2003 | FR |
| 1b.JP.1988.blood_donor.D89815               | D89815   | 1b | 1988 | JP |
| 1b.JP.1991.AH1.AB429050                     | AB429050 | 1b | 1991 | JP |
| 1b.JP.2008.HCV-K.AB249644                   | AB249644 | 1b | 2008 | JP |

|                                              |          |    |      |    |
|----------------------------------------------|----------|----|------|----|
| 1b.NZ.2008.107.JX437201                      | JN437201 | 1b | 2008 | NZ |
| 1b.NZ.2008.116.JX437210                      | JN437210 | 1b | 2008 | NZ |
| 1b.NZ.2009.205.JX437216                      | JN437216 | 1b | 2009 | NZ |
| 1b.NZ.2009.301.JX437222                      | JN437222 | 1b | 2009 | NZ |
| 1b.RU.1999.N589.AY587844                     | AY587844 | 1b | 1999 | RU |
| 1b.RU.2000.817-06.HQ641455                   | JN641455 | 1b | 2000 | RU |
| 1b.RU.2000.895-06.HQ641456                   | JN641456 | 1b | 2000 | RU |
| 1b.RU.2001.814-06.HQ641453                   | JN641453 | 1b | 2001 | RU |
| 1b.RU.2002.176-04.GU254019                   | JN254019 | 1b | 2002 | RU |
| 1b.RU.2002.187-04.GU254022                   | JN254022 | 1b | 2002 | RU |
| 1b.RU.2006.820-06.HQ641454                   | JN641454 | 1b | 2006 | RU |
| 1b.RU.2018.HCV_NWFD_1cg_coinf18.MT512570     | MT512570 | 1b | 2018 | RU |
| 1b.US.1989.HCV-1b/US/BID-V133/1989.EU155333  | EU155333 | 1b | 1989 | US |
| 1b.US.1990.HCV-1b/US/BID-V131/1990.EU155331  | EU155331 | 1b | 1990 | US |
| 1b.US.1991.HCV-1b/US/BID-V122/1991.EU155325  | EU155325 | 1b | 1991 | US |
| 1b.US.1992.HCV-1b/US/BID-V121/1992.EU155324  | EU155324 | 1b | 1992 | US |
| 1b.US.1994.HCV-1b/US/BID-V130/1994.EU155330  | EU155330 | 1b | 1994 | US |
| 1b.US.1995.C2.FJ380065                       | FJ380065 | 1b | 1995 | US |
| 1b.US.1996.C1.FJ380064                       | FJ380064 | 1b | 1996 | US |
| 1b.US.1997.C3.FJ380066                       | FJ380066 | 1b | 1997 | US |
| 1b.US.1998.N5_post.FJ380078                  | FJ380078 | 1b | 1998 | US |
| 1b.US.2001.HCV-1b/US/BID-V154/2001.EU660388  | EU660388 | 1b | 2001 | US |
| 1b.US.2002.HCV-1b/US/BID-V163/2002.EU155231  | EU155231 | 1b | 2002 | US |
| 1b.US.2003.HCV-1b/US/BID-V158/2003.EU155228  | EU155228 | 1b | 2003 | US |
| 1b.US.2003.HCV-1b/US/BID-V383/2003.EU482881  | EU482881 | 1b | 2003 | US |
| 1b.US.2004.HCV-1b/US/BID-V156/2004.EU155226  | EU155226 | 1b | 2004 | US |
| 1b.US.2005.HCV-1b/US/BID-V384/2005.EU155263  | EU155263 | 1b | 2005 | US |
| 1b.US.2006.HCV-1b/US/BID-V458/2006.EU482886  | EU482886 | 1b | 2006 | US |
| 1b.US.2007.HCV-1b/US/BID-V1715/2007.FJ024279 | FJ024279 | 1b | 2007 | US |
| 1b/2b.JP.2010.HC10-0804.AB622121             | AB622121 | 1b | 2010 | JP |
| 1b/2k.RU.1999.N687.AY587845                  | AY587845 | 1b | 1999 | RU |
| 2.CM.2016.S6309.MH477423                     | JN477423 | 2  | 2016 | CM |
| 2.FR.1995.MRS40.KC197238                     | JN197238 | 2  | 1995 | FR |
| 2.FR.2001.MRS117.KC197237                    | JN197237 | 2  | 2001 | FR |
| 2.FR.2009.PTR9203.KC197239                   | JN197239 | 2  | 2009 | FR |
| 2a.CN.2011.ZS623.KC844043                    | KC844043 | 2a | 2011 | CN |
| 2a.DK.2012.T9/JFH1.KC967476                  | KC967476 | 2a | 2012 | DK |
| 2a.JP.2011.AB690460.AB690460                 | AB690460 | 2a | 2011 | JP |
| 2a.US.2010.JFH1-AM120.KF700370               | KF700370 | 2b | 2010 | US |
| 2b.CN.2010.ZS260.KC844048                    | KC844048 | 2b | 2010 | CN |
| 2b.DK.2012.J8CF.JQ745651                     | JQ745651 | 2b | 2012 | DK |
| 2b.DK.2018.pt#6-Week32.MT995339              | MT995339 | 2b | 2018 | DK |
| 2b.DK.2018.pt#6-Week40.MT995340              | MT995340 | 2b | 2018 | DK |
| 2b.FR.2001.MRS129.KC197226                   | KC197226 | 2b | 2001 | FR |
| 2b/1a.US.2014.Subject_24.MK548367            | MK548367 | 2b | 2014 | US |

|                                      |          |       |      |    |
|--------------------------------------|----------|-------|------|----|
| 2b/1a.US.2015.Subject_26.MK548369    | MK548369 | 2b    | 2015 | US |
| 2c.DK.2012.S83/JFH1.KC967479         | KC967479 | 2c    | 2012 | DK |
| 2c.FR.2004.FrBd3618.KC197228         | KC197228 | 2c    | 2004 | FR |
| 2c.FR.2008.PTR1256.KC197227          | KC197227 | 2c    | 2008 | FR |
| 2f.CN.2002.98799.KC844050            | JN844050 | 2f    | 2002 | CN |
| 2f.CN.2010.ZS542.KC844042            | KC844042 | 2f    | 2010 | CN |
| 2i.FR.1995.MRS37.KC197229            | KC197229 | 2i    | 1995 | FR |
| 2i.FR.2001.MRS178.KC197231           | KC197231 | 2i    | 2001 | FR |
| 2i.FR.2008.PTR9415.KC197230          | KC197230 | 2i    | 2008 | FR |
| 2j.FR.2005.FrBd0565.KC197232         | KC197232 | 2j    | 2005 | FR |
| 2j.FR.2009.PTR2795.KC197233          | KC197233 | 2j    | 2009 | FR |
| 2j.VE.2005.C1292.HM777359            | HM777359 | 2j    | 2005 | VE |
| 2k.FR.2009.PTR3874.KC197234          | KC197234 | 2k    | 2009 | FR |
| 2k/1b.BE.2014.subject_23.MK527509    | MK527509 | 2k/1b | 2014 | BE |
| 2l.FR.1995.MRS89.KC197235            | KC197235 | 2l    | 1995 | FR |
| 2l.FR.2008.PTR7904.KC197240          | KC197240 | 2l    | 2008 | FR |
| 2q.ES.2002.963.FN666428              | JN666428 | 2q    | 2002 | ES |
| 3.CA._.QC115.JF735124                | JN735124 | 3     | -    | CA |
| 3.CN.2016.2584.MN385583              | MN385583 | 3     | 2016 | CN |
| 3a.CN.2008.PR87.HQ912953             | HQ912953 | 3a    | 2008 | CN |
| 3a.CN.2011.ZS633.KC844041            | KC844041 | 3a    | 2011 | CN |
| 3a.CN.2018.PR87A.MN231294            | MN231294 | 3a    | 2018 | CN |
| 3a.DE._.HCVCENS1.X76918              | X76918   | 3a    | -    | DE |
| 3a.DK.2018.pt#8-Week32.MT995349      | MT995349 | 3a    | 2018 | DK |
| 3a.DK.2018.pt#8-Week40.MT995350      | MT995350 | 3a    | 2018 | DK |
| 3a.GB.2005.Patient_235.GQ356206      | GQ356206 | 3a    | 2005 | GB |
| 3A.IL.2016.2000912.MT632158          | JN632158 | 3a    | 2016 | IL |
| 3A.IL.2017.2001065.MT632172          | JN632172 | 3a    | 2017 | IL |
| 3a.IN.2003.GQ275355.GQ275355         | GQ275355 | 3a    | 2003 | IN |
| 3a.IN.2008.ILBSRAS9.JQ717260         | JQ717260 | 3a    | 2008 | IN |
| 3a.IN.2010.ILBSRAS8.JQ717259         | JQ717259 | 3a    | 2010 | IN |
| 3a.IN.2011.ILBSRAS7.JQ717258         | JQ717258 | 3a    | 2011 | IN |
| 3a.IN.2012.ILBSRAS_UG.KF035127       | KF035127 | 3a    | 2012 | IN |
| 3b.CN.2011.SH37.JQ065709             | JQ065709 | 3b    | 2011 | CN |
| 3b.CN.2011.ZS650.KC844044            | KC844044 | 3b    | 2011 | CN |
| 3i.IN.2002.IND-HCV-3i.FJ407092       | FJ407092 | 3i    | 2002 | IN |
| 4.EG.2018.EG.MN782309                | JN782309 | 4     | 2018 | EG |
| 4a.JP.2012.HCVgenotype4a-KM.AB795432 | AB795432 | 4a    | 2012 | JP |
| 4d.CN.2010.ZS537.KC844045            | KC844045 | 4d    | 2010 | CN |
| 4f.CM.2016.S6406.MH477424            | MH477424 | 4f    | 2016 | CM |
| 4k.UG.2014.U275_Nakaseeta.MH742364   | MH742364 | 4k    | 2014 | UG |
| 4k.UG.2014.U317_Butiti.MH742370      | MH742370 | 4k    | 2014 | UG |
| 4q.UG.2014.U149_Bulwadda.MH742362    | MH742362 | 4q    | 2014 | UG |
| 4q.UG.2014.U282_Nalunnya.MH742366    | MH742366 | 4q    | 2014 | UG |
| 4s.UG.2014.U295_Busoga.MH742368      | MH742368 | 4s    | 2014 | UG |

|                                   |          |    |      |    |
|-----------------------------------|----------|----|------|----|
| 4v.UG.2014.U278_Nalunnya.MH742365 | MH742365 | 4v | 2014 | UG |
| 4v.UG.2014.U294_Busoga.MH742367   | MH742367 | 4v | 2014 | UG |
| 6.CN.2014.HCV074.MK327985         | JN327985 | 6  | 2014 | CN |
| 6.CN.2014.HCV075.MK327996         | JN327996 | 6  | 2014 | CN |
| 6.CN.2014.HCV076.MK328005         | JN328005 | 6  | 2014 | CN |
| 6.CN.2014.HCV077.MK327984         | JN327984 | 6  | 2014 | CN |
| 6.CN.2014.HCV092.MK328009         | JN328009 | 6  | 2014 | CN |
| 6.CN.2014.HCV093.MK328001         | JN328001 | 6  | 2014 | CN |
| 6.CN.2014.HCV094.MK328019         | JN328019 | 6  | 2014 | CN |
| 6.CN.2014.HCV104.MK327998         | JN327998 | 6  | 2014 | CN |
| 6.CN.2015.HCV084.MK328003         | JN328003 | 6  | 2015 | CN |
| 6.CN.2015.HCV099.MK328006         | JN328006 | 6  | 2015 | CN |
| 6.CN.2015.HCV101.MK327981         | JN327981 | 6  | 2015 | CN |
| 6.CN.2015.HCV156.MK328013         | JN328013 | 6  | 2015 | CN |
| 6.DK.2019.HVH-HCV334.MN240359     | MN240359 | 6  | 2019 | DK |
| 6.MY.2010.10MYKJ032.KC191671      | JN191671 | 6  | 2010 | MY |
| 6a.CN.2008.PR144.HQ912955         | HQ912955 | 6a | 2008 | CN |
| 6a.CN.2008.PR58.HQ912954          | HQ912954 | 6a | 2008 | CN |
| 6a.CN.2009.ZS221.KC844037         | KC844037 | 6a | 2009 | CN |
| 6a.CN.2011.ZS674.KC844038         | KC844038 | 6a | 2011 | CN |
| 6v.CN.2004.NK46.EU158186          | EU158186 | 6v | 2004 | CN |

---
