# Supplementary material for: Phylogenetic and Phylodynamic Analyses of HCV Strains Circulating among Patients Using Injectable Drugs in Central Italy
Source: MDPI journal article supplement (doi:10.3390/microorganisms9071432), 2021-07-02
Supplement: s1 [file s1]

**Table S4.** HCV genome reference sequences

| Reference     | GenBank    |          |
|---------------|------------|----------|
|               | Acc.Number | Genotype |
| AB661382_gt2b | AB661382   | 2b       |
| AB661388_gt2b | AB661388   | 2b       |
| D00944_gt2a   | D00944     | 2a       |
| D50409_gt2c   | D50409     | 2c       |
| DQ278894_gt6n | DQ278894   | 6n       |
| DQ418786_gt4d | DQ418786   | 4d       |
| DQ418789_gt4a | DQ418789   | 4a       |
| DQ835766_gt6m | DQ835766   | 6m       |
| DQ835767_gt6m | DQ835767   | 6m       |
| DQ988074_gt4a | DQ988074   | 4a       |
| EF108306_gt7a | EF108306   | 7a       |
| EF407457_gt1a | EF407457   | 1a       |
| EU246938_gt6n | EU246938   | 6n       |
| EU392172_gt4d | EU392172   | 4d       |
| EU781827_gt1b | EU781827   | 1b       |
| EU781828_gt1b | EU781828   | 1b       |
| FJ462440_gt4o | FJ462440   | 4o       |
| HQ639944_gt2a | HQ639944   | 2a       |
| HQ850279_gt1a | HQ850279   | 1a       |
| X76918_gt3a   | X76918     | 3a       |
| JN714194_gt3a | JN714194   | 3a       |
| JX227949_gt2c | JX227949   | 2c       |
| JX227977_gt4o | JX227977   | 4o       |
