# Supplementary material for: Phylogenetic and Phylodynamic Analyses of HCV Strains Circulating among Patients Using Injectable Drugs in Central Italy
Source: MDPI journal article supplement (doi:10.3390/microorganisms9071432), 2021-07-02
Supplement: s1 [file s1]

**Table S2.** Non-SerD patients included in our phylogenetic analysis

| <b>Patients</b>       | <b>Collection Date</b> | <b>Age (years)</b> | <b>Genotype</b> | <b>GenBank<br/>Acc.Number</b> |
|-----------------------|------------------------|--------------------|-----------------|-------------------------------|
| Pt_156_MUSROB_2c_2016 | 05/11/2015             | 61                 | 2c              | MW927662                      |
| Pt_179_COCBRU_1a_2016 | 21/09/2016             | 56                 | 1a              | MW927663                      |
| Pt_191_MANGIU_4d_2016 | 02/11/2016             | 65                 | 4d              | MW927664                      |
| Pt_196_BERMAU_1a_2017 | 09/03/2017             | 54                 | 1a              | MW927665                      |
| Pt_197_MANMAR_3a_2017 | 05/04/2017             | 61                 | 3a              | MW927666                      |
| Pt_199_MATTAN_3a_2017 | 15/03/2017             | 41                 | 3a              | MW927667                      |
| Pt_201_MORMAR_1a_2017 | 30/03/2017             | 52                 | 1a              | MW927668                      |
| Pt_202_GATGIO_2c_2017 | 13/04/2017             | 72                 | 2c              | MW927669                      |
| Pt_203_CASSTE_1b_2017 | 11/04/2017             | 49                 | 1b              | MW927670                      |
| Pt_204_SERMAU_1b_2017 | 18/05/2017             | 81                 | 1b              | MW927671                      |
| Pt_208_MORMAU_1b_2017 | 30/05/2017             | 62                 | 1b              | MW927672                      |
| Pt_211_VILMAR_2c_2017 | 28/09/2017             | 77                 | 2c              | MW927673                      |
| Pt_213_BONPAO_2c_2017 | 30/09/2017             | 66                 | 2c              | MW927674                      |
| Pt_217_DANMAR_1a_2018 | 09/01/2018             | 51                 | 1a              | MW927675                      |
| Pt_221_ORTMIG_3a_2018 | 20/04/2018             | 44                 | 3a              | MW927676                      |
| Pt_222_DSCAGO_1b_2020 | 17/04/2020             | 80                 | 1b              | MW927677                      |
| Pt_223_UGUMIR_3a_2020 | 29/04/2020             | 51                 | 3a              | MW927678                      |
| Pt_224_GIUJUR_1a_2020 | 21/04/2020             | 29                 | 1a              | MW927679                      |
| Pt_225_LWICHO_6m_2019 | 27/07/2019             | 55                 | 6m              | MW927680                      |
| Pt_226_DIEGIN_2c_2019 | 24/08/2019             | 75                 | 2c              | MW927681                      |
| Pt_227_MARCHI_3a_2018 | 14/12/2018             | 54                 | 3a              | MW927682                      |
| Pt_228_UDDSHA_3b_2019 | 07/05/2019             | 41                 | 3b              | MW927683                      |
| Q0219_MARGIO_gt3a     | 17/01/2018             | 60                 | 3a              | MW927684                      |
| Q0482_BOCMAR_gt1b     | 02/02/2018             | 43                 | 1b              | MW927685                      |
| Q0531_SALCLA_gt1a     | 02/02/2017             | 58                 | 1a              | MW927686                      |
| Q0668_PETAGO_gt4d     | 10/02/2017             | 58                 | 4d              | MW927687                      |
| Q0870_ABBSAV_gt2c     | 24/02/2017             | 72                 | 2c              | MW927688                      |
| Q0889_GIRFRA_gt1a     | 25/02/2017             | 51                 | 1a              | MW927689                      |
| Q1134_SOLFAB_gt1b     | 11/03/2017             | 62                 | 1b              | MW927690                      |
| Q1282_CANLUI_gt3a     | 20/03/2017             | 54                 | 3a              | MW927691                      |
| Q1370_MARMAU_gt3a     | 03/05/2018             | 61                 | 3a              | MW927692                      |
| Q1603_PIEROM_gt2c     | 25/05/2018             | 79                 | 2c              | MW927693                      |
| Q1814_IACSAM_gt4d     | 10/06/2019             | 51                 | 4d              | MW927694                      |
| Q2030_CARRAF_gt2c     | 06/07/2019             | 76                 | 2c              | MW927695                      |
| Q2394_DIVANT_gt1a     | 18/11/2020             | 49                 | 1a              | MW927696                      |
| Q2811_AMOMAU_gt4d     | 01/10/2019             | 59                 | 4d              | MW927697                      |
| Q3383_ALFVIN_gt4d     | 07/07/2017             | 60                 | 4d              | MW927698                      |
| Q3514_POLMAR_gt2c     | 06/12/2019             | 79                 | 2c              | MW927699                      |
| Q3593_SAWMOO_gt6n     | 24/12/2016             | 42                 | 6n              | MW927700                      |
| Q3979_RAZROM_gt3a     | 16/08/2017             | 54                 | 3a              | MW927701                      |
| Q5594_GIOLUC_gt1b     | 19/10/2017             | 71                 | 1b              | MW927702                      |
| Q6164_IANMAU_gt1a     | 17/11/2017             | 45                 | 1a              | MW927703                      |
