# Supplementary material for: Phylogenetic and Phylodynamic Analyses of HCV Strains Circulating among Patients Using Injectable Drugs in Central Italy
Source: MDPI journal article supplement (doi:10.3390/microorganisms9071432), 2021-07-02
Supplement: s1 [file s1]

**Table S6.** Estimation of temporal reproduction number distribution using a Birth-Death Skyline (serial) model for heterochronous HCV sequences for A) Gt1a and B) Gt3a. For these analyses, a GTR gamma site model (4 categories) was selected with a strict molecular clock with sequence date constraints where possible.

| <b>A)</b>                   |                      | <b>Gt1a - Birth and Death Skyline Serial (with heterochronous reference sequences)</b> |                      |                      |                      |                      |                      |                      |                      |                       |
|-----------------------------|----------------------|----------------------------------------------------------------------------------------|----------------------|----------------------|----------------------|----------------------|----------------------|----------------------|----------------------|-----------------------|
| <b>Summary Statistic</b>    | <b>Rep.Num. ser1</b> | <b>Rep.Num. ser2</b>                                                                   | <b>Rep.Num. ser3</b> | <b>Rep.Num. ser4</b> | <b>Rep.Num. ser5</b> | <b>Rep.Num. ser6</b> | <b>Rep.Num. ser7</b> | <b>Rep.Num. ser8</b> | <b>Rep.Num. ser9</b> | <b>Rep.Num. ser10</b> |
| mean                        | 1.5479               | 1.283                                                                                  | 1.4067               | 1.5229               | 0.9763               | 1.8373               | 0.8858               | 1.8074               | 0.2154               | 2.118                 |
| stderr of mean              | 0.0105               | 7.61E-03                                                                               | 0.0113               | 0.0168               | 0.023                | 0.0182               | 7.27E-03             | 5.64E-03             | 2.04E-03             | 4.15E-03              |
| stdev                       | 0.6206               | 0.4382                                                                                 | 0.3665               | 0.4275               | 0.4838               | 0.4343               | 0.2673               | 0.2351               | 0.1078               | 0.194                 |
| variance                    | 0.3852               | 0.192                                                                                  | 0.1343               | 0.1827               | 0.2341               | 0.1886               | 0.0715               | 0.0553               | 0.0116               | 0.0376                |
| median                      | 1.5431               | 1.2729                                                                                 | 1.3805               | 1.5298               | 0.9218               | 1.8346               | 0.8696               | 1.7853               | 0.1998               | 2.1161                |
| value range                 | [0.0482 - 5.2719]    | [0.0541 - 3.7925]                                                                      | [0.2351 - 3.6463]    | [0.0834 - 3.3931]    | [0.036 - 4.0929]     | [0.1529 - 4.2651]    | [0.0488 - 2.4373]    | [1.15 - 3.3258]      | [0.0124 - 0.6533]    | [1.4734 - 3.2902]     |
| geometric mean              | 1.3904               | 1.1946                                                                                 | 1.3571               | 1.4524               | 0.8467               | 1.7806               | 0.8426               | 1.7927               | 0.1876               | 2.1092                |
| 95% HPD interval            | [0.2342 - 2.6779]    | [0.4141 - 2.1706]                                                                      | [0.7311 - 2.1739]    | [0.7018 - 2.3839]    | [0.1271 - 1.8762]    | [0.9718 - 2.6893]    | [0.3656 - 1.4315]    | [1.3798 - 2.2674]    | [0.0351 - 0.4265]    | [1.7265 - 2.4958]     |
| auto-correlation time (ACT) | 25888.7019           | 27119.8096                                                                             | 85455.2471           | 1.39E+05             | 2.04E+05             | 1.58E+05             | 66497.517            | 51850.4486           | 32404.581            | 41148.3108            |
| effective sample size (ESS) | 3476.8               | 3319                                                                                   | 1053.3               | 649.8                | 441.5                | 571.2                | 1353.6               | 1736                 | 2777.7               | 2187.5                |

  

| <b>B)</b>                |                      | <b>Gt3a - Birth and Death Skyline Serial (with heterochronous reference sequences)</b> |                      |                      |                      |                      |                      |                      |                      |                       |
|--------------------------|----------------------|----------------------------------------------------------------------------------------|----------------------|----------------------|----------------------|----------------------|----------------------|----------------------|----------------------|-----------------------|
| <b>Summary Statistic</b> | <b>Rep.Num. ser1</b> | <b>Rep.Num. ser2</b>                                                                   | <b>Rep.Num. ser3</b> | <b>Rep.Num. ser4</b> | <b>Rep.Num. ser5</b> | <b>Rep.Num. ser6</b> | <b>Rep.Num. ser7</b> | <b>Rep.Num. ser8</b> | <b>Rep.Num. ser9</b> | <b>Rep.Num. ser10</b> |
| mean                     | 1.6017               | 1.2753                                                                                 | 1.131                | 1.5586               | 2.2974               | 2.1265               | 1.2903               | 1.6209               | 0.7808               | 4.0375                |
| stderr of mean           | 0.0189               | 0.0129                                                                                 | 0.0157               | 0.0258               | 0.03                 | 0.0254               | 0.0172               | 0.012                | 6.51E-03             | 0.0225                |
| stdev                    | 1.1468               | 0.947                                                                                  | 0.8825               | 1.1228               | 1.2448               | 1.0704               | 0.7614               | 0.676                | 0.4409               | 1.1653                |
| variance                 | 1.3151               | 0.8968                                                                                 | 0.7788               | 1.2607               | 1.5495               | 1.1457               | 0.5798               | 0.457                | 0.1944               | 1.3579                |
| median                   | 1.3537               | 1.0467                                                                                 | 0.8911               | 1.3303               | 2.1885               | 2.0168               | 1.1846               | 1.5572               | 0.7134               | 3.8584                |
| value range              | [0.0275 - 9.4154]    | [0.0185 - 9.8026]                                                                      | [0.0243 - 7.7233]    | [0.0182 - 9.6665]    | [0.0499 - 12.365]    | [0.0316 - 8.3218]    | [0.0275 - 7.2939]    | [0.068 - 6.8398]     | [0.0308 - 3.7874]    | [1.5426 - 10.9997]    |
| geometric mean           | 1.1831               | 0.9485                                                                                 | 0.8324               | 1.1588               | 1.9082               | 1.8319               | 1.0569               | 1.4741               | 0.6554               | 3.8835                |
| 95% HPD interval         | [0.058 - 3.7762]     | [0.0504 - 3.1188]                                                                      | [0.0243 - 2.8636]    | [0.0475 - 3.7554]    | [0.1054 - 4.4933]    | [0.1919 - 4.0915]    | [0.0765 - 2.7055]    | [0.3255 - 2.8535]    | [0.0687 - 1.6098]    | [2.0762 - 6.3402]     |

|                                |            |            |            |            |            |            |            |            |            |            |
|--------------------------------|------------|------------|------------|------------|------------|------------|------------|------------|------------|------------|
| auto-correlation<br>time (ACT) | 24483.1004 | 16807.0898 | 28550.7115 | 47562.4249 | 52281.9587 | 50628.9133 | 46169.7142 | 28258.5842 | 19620.4856 | 33577.8801 |
| effective sample<br>size (ESS) | 3676.4     | 5355.5     | 3152.6     | 1892.5     | 1721.6     | 1777.8     | 1949.5     | 3185.2     | 4587.6     | 2680.6     |
