# Supplementary material for: Phylogenetic and Phylodynamic Analyses of HCV Strains Circulating among Patients Using Injectable Drugs in Central Italy
Source: MDPI journal article supplement (doi:10.3390/microorganisms9071432), 2021-07-02
Supplement: s1 [file s1]

**Table S3.** SerD patients included in our phylogenetic analysis

| <b>Patients</b> | <b>Collection Date</b> | <b>Age (years)</b> | <b>Genotype</b> | <b>GenBank<br/>Acc.Number</b> |
|-----------------|------------------------|--------------------|-----------------|-------------------------------|
| INMI_10_GIAANT  | 03/05/2018             | 57                 | 3a              | MW927598                      |
| INMI_107_DELGIO | 04/07/2019             | 46                 | 3a              | MW927596                      |
| INMI_109_LUCATT | 10/04/2019             | 62                 | 1a              | MW927597                      |
| INMI_11_MALLAU  | 03/05/2018             | 60                 | 1a              | MW927600                      |
| INMI_114_FUBSAN | 13/04/2019             | 55                 | 2               | MW927599                      |
| INMI_120_GILENZ | 21/03/2019             | 63                 | 2               | MW927601                      |
| INMI_13_CELSIL  | 12/11/2018             | 37                 | 1a              | MW927605                      |
| INMI_132_CAPALB | 04/06/2019             | 55                 | 1a              | MW927602                      |
| INMI_133_CAREMA | 13/04/2019             | 51                 | 3a              | MW927603                      |
| INMI_136_DIGGAB | 20/03/2019             | 48                 | 1a              | MW927604                      |
| INMI_140_SILARM | 29/04/2019             | 55                 | 1a              | MW927606                      |
| INMI_148_MEZSIM | 11/03/2019             | 33                 | 1a              | MW927607                      |
| INMI_152_BARMAS | 30/04/2019             | 66                 | 3a              | MW927608                      |
| INMI_153_BRAPIE | 21/01/2020             | 51                 | 1a              | MW927609                      |
| INMI_154_CAPALF | 22/05/2019             | 51                 | 4               | MW927610                      |
| INMI_159_PAGLUC | 12/06/2019             | 53                 | 1a              | MW927611                      |
| INMI_162_URBALE | 17/04/2019             | 49                 | 3a              | MW927612                      |
| INMI_170_MONFAB | 10/04/2019             | 56                 | 1a              | MW927613                      |
| INMI_173_STOGIA | 15/05/2019             | 54                 | 1a              | MW927614                      |
| INMI_178_BINAND | 13/05/2019             | 59                 | 3a              | MW927615                      |
| INMI_180_GENFED | 04/06/2019             | 40                 | 3a              | MW927616                      |
| INMI_182_PASGER | 15/07/2019             | 47                 | 3a              | MW927617                      |
| INMI_188_SABBRU | 02/04/2019             | 30                 | 1a              | MW927618                      |
| INMI_189_SANGIO | 11/04/2019             | 40                 | 1a              | MW927619                      |
| INMI_192_TRIDAV | 13/05/2019             | 52                 | 1a              | MW927620                      |
| INMI_2_BONUMB   | 05/04/2018             | 50                 | 1a              | MW927636                      |
| INMI_207_OTTGIA | 08/07/2019             | 46                 | 1a              | MW927621                      |
| INMI_212_CIPRIT | 03/07/2019             | 51                 | 4               | MW927622                      |
| INMI_213_DEPMAR | 07/05/2019             | 56                 | 4               | MW927623                      |
| INMI_223_DISGIO | 31/05/2019             | 54                 | 3a              | MW927624                      |
| INMI_226_BARVIR | 30/07/2019             | 53                 | 1b              | MW927625                      |
| INMI_23_MURMAU  | 26/06/2018             | 60                 | 1a              | MW927631                      |
| INMI_231_BUSGIA | 15/07/2019             | 45                 | 3a              | MW927626                      |
| INMI_232_CARMAR | 12/06/2019             | 53                 | 3a              | MW927627                      |
| INMI_234_MARSTE | 12/06/2019             | 56                 | 1a              | MW927628                      |
| INMI_237_DECFAB | 03/08/2019             | 53                 | 3a              | MW927629                      |
| INMI_238_SGRENZ | 12/06/2019             | 65                 | 2               | MW927630                      |
| INMI_255_CUGROB | 22/05/2019             | 50                 | 4               | MW927632                      |
| INMI_261_FALBRU | 30/05/2019             | 60                 | 1b              | MW927633                      |
| INMI_262_MIOFAB | 15/07/2019             | 50                 | 1a              | MW927634                      |
| INMI_266_ANGSER | 12/06/2019             | 54                 | 3a              | MW927635                      |

|                   |            |    |    |          |
|-------------------|------------|----|----|----------|
| INMI_31_GALMAS    | 25/08/2018 | 45 | 1a | MW927638 |
| INMI_313_LENMAR   | 06/11/2019 | 47 | 3a | MW927637 |
| INMI_322_PICROC   | 24/09/2019 | 60 | 3a | MW927639 |
| INMI_337_LIGFRA   | 18/09/2019 | 50 | 1a | MW927640 |
| INMI_35_VENMAR    | 29/08/2018 | 45 | 1a | MW927642 |
| INMI_357_CASMAS   | 14/10/2019 | 51 | 4o | MW927641 |
| INMI_36_BREALE    | 31/10/2018 | 42 | 3a | MW927644 |
| INMI_365_BARCAR   | 06/11/2019 | 54 | 3a | MW927643 |
| INMI_37_SINLUC    | 27/08/2018 | 45 | 3a | MW927645 |
| INMI_38_CECSTE    | 04/06/2019 | 67 | 1a | MW927647 |
| INMI_386_GESLAU   | 15/01/2020 | 45 | 3a | MW927646 |
| INMI_395_PICPAO   | 04/12/2019 | 54 | 4  | MW927648 |
| INMI_411_DEVGIU   | 05/12/2019 | 44 | 1a | MW927649 |
| INMI_419_ADAALE   | 10/12/2019 | 53 | 1a | MW927650 |
| INMI_420_BRURIC   | 15/01/2020 | 41 | 3a | MW927651 |
| INMI_47_AMUASI    | 31/10/2018 | 24 | 3a | MW927652 |
| INMI_48_FELEMI    | 06/02/2019 | 33 | 3a | MW927653 |
| INMI_49_VENRENGIU | 08/11/2018 | 57 | 1b | MW927654 |
| INMI_52_CARIDO    | 07/11/2018 | 47 | 1a | MW927655 |
| INMI_55_FINALI    | 23/01/2019 | 27 | 1a | MW927656 |
| INMI_61_DERALE    | 29/12/2018 | 52 | 1a | MW927657 |
| INMI_74_ASTALE    | 27/02/2019 | 36 | 1a | MW927658 |
| INMI_83_COMENR    | 15/05/2019 | 55 | 1a | MW927659 |
| INMI_88_SCACAR    | 29/04/2019 | 50 | 3a | MW927660 |
| INMI_90_DIGEMI    | 20/02/2019 | 55 | 1a | MW927661 |

---
